# Supplementary material
Source: Elsevier journal article supplement (https://authors.library.caltech.edu/45917/7/mmc1.pdf)

Electronic Appendix: Figures EA1 to EA5  
X-ray maps for Cl and P for the chondrites studied,  
showing the distribution of merrillite and chlorapatite.

Figure EA1: Bo Xian UNM 265, map A

Figure EA2: Bo Xian UNM 265, map B

Figure EA3: Bjurböle UNM 117

Figure EA4: Tuxtuac, UNM 627

Figure EA5: St. Séverin, UNM 693

Figure EA1: Bo Xian UNM 265, map A

4 x 4 mm

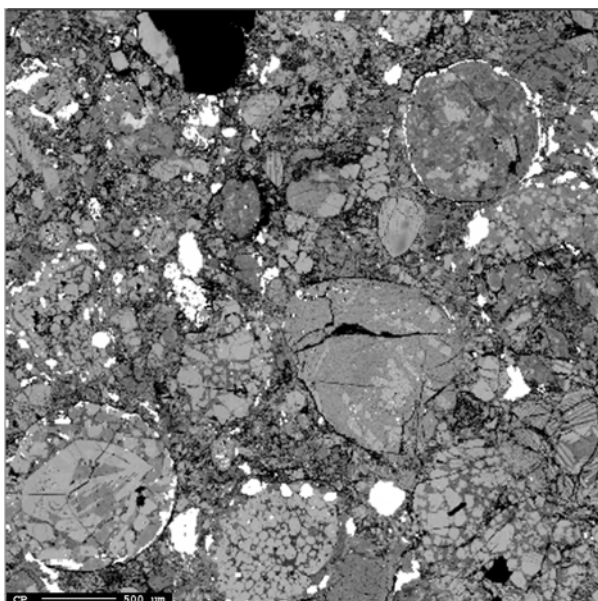

BSE

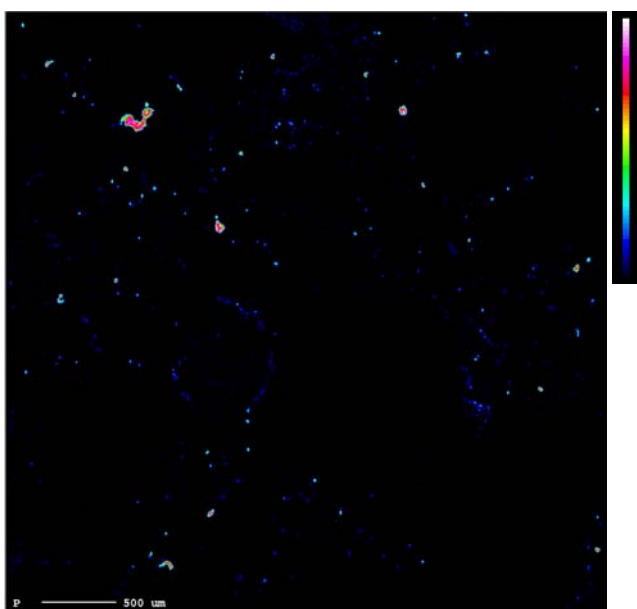

P K $\alpha$

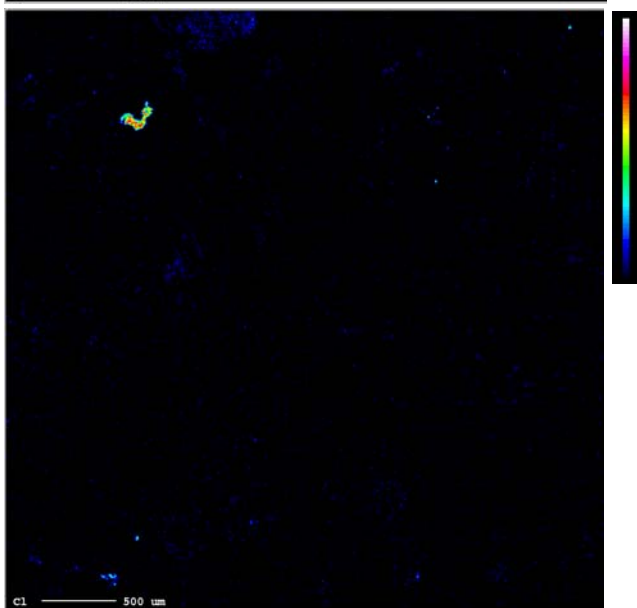

Cl K $\alpha$

Figure EA2: Bo Xian UNM 265, map B

4 x 4 mm

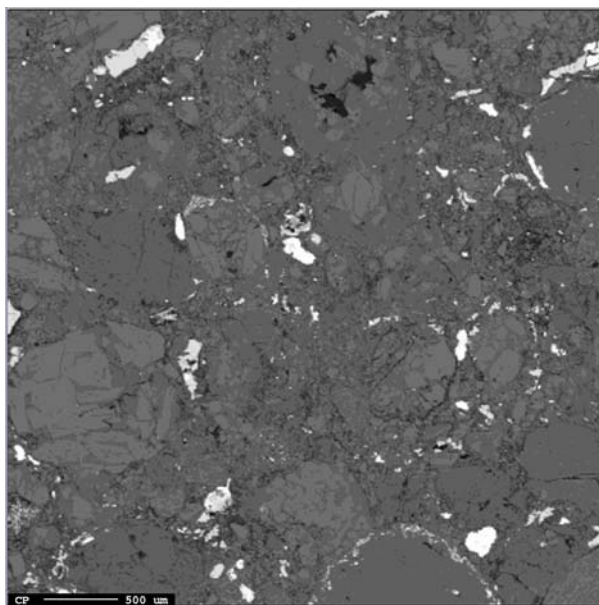

BSE

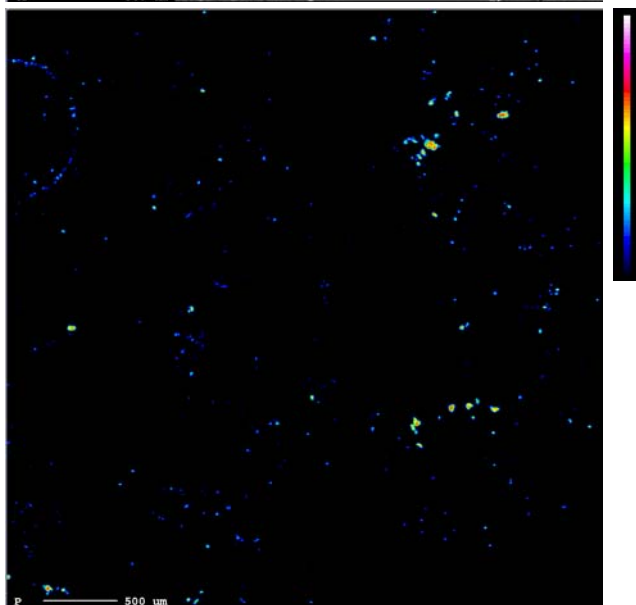

P K $\alpha$

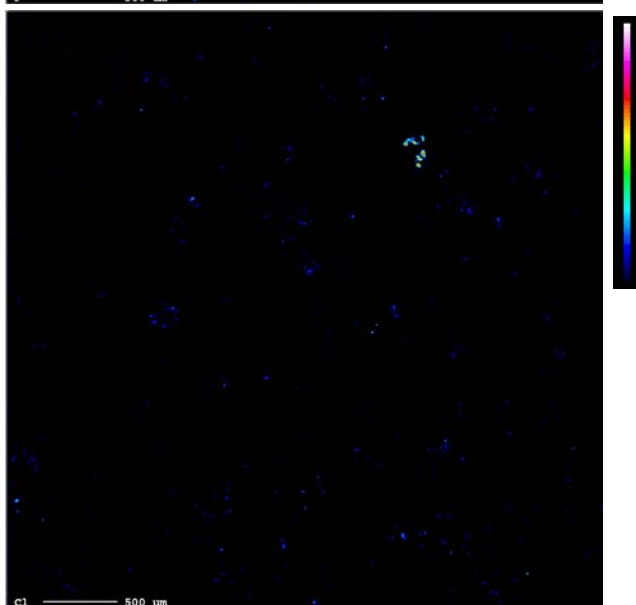

Cl K $\alpha$

Figure EA3: Bjurböle UNM 117

12 x 9 mm

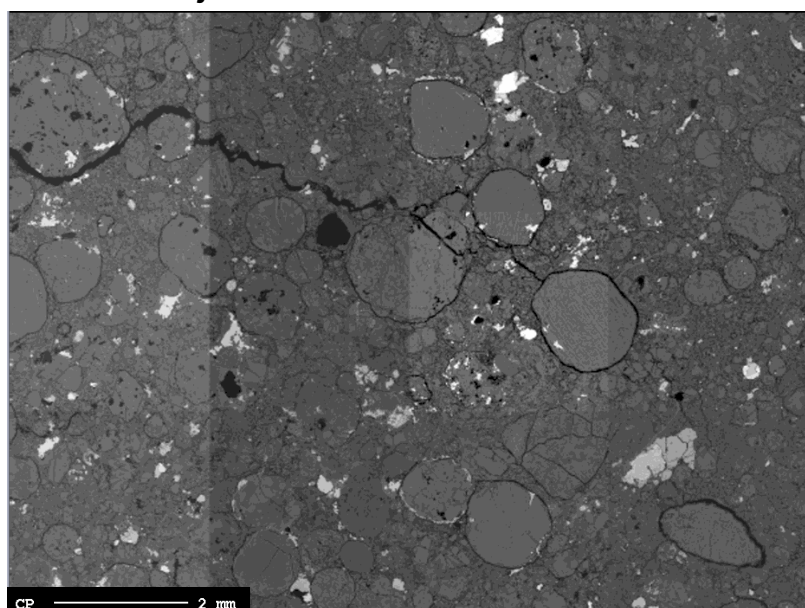

BSE

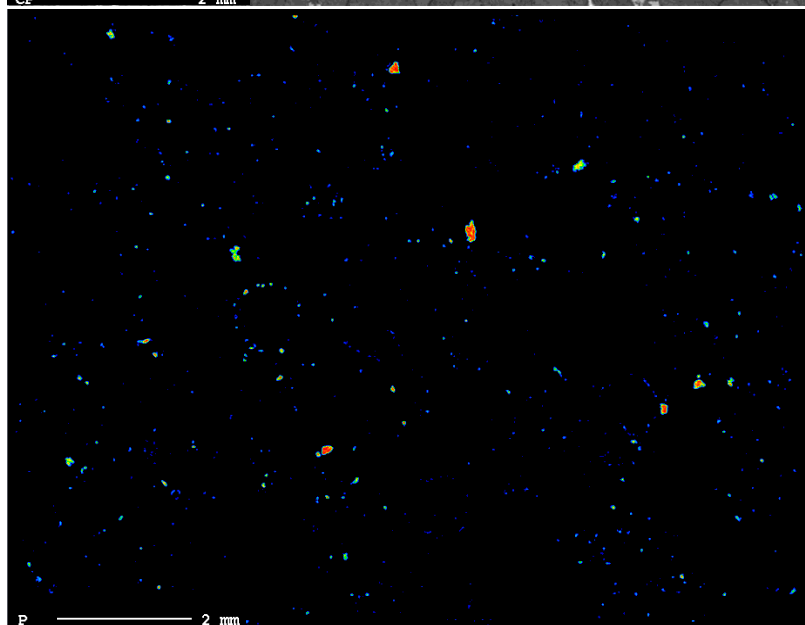

P K $\alpha$

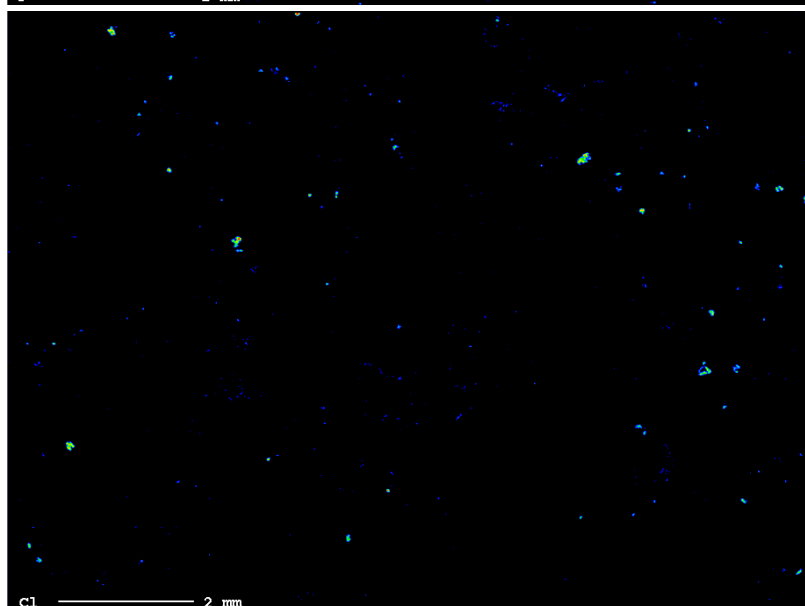

Cl K $\alpha$

Figure EA4: Tuxtuac, UNM 627

8 x 8 mm

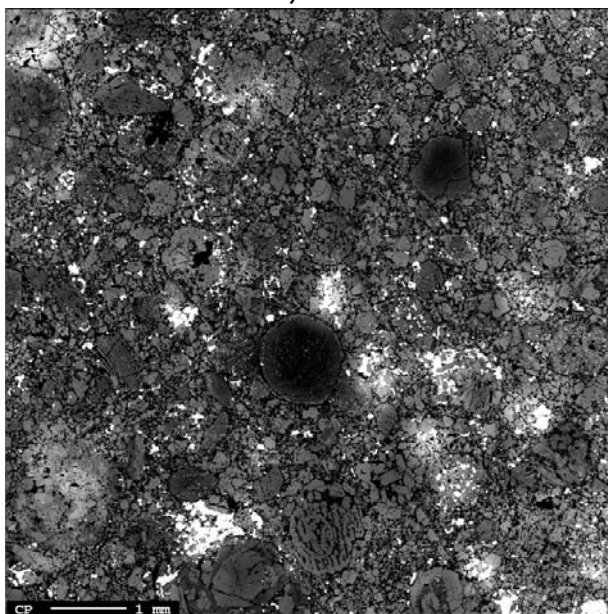

BSE

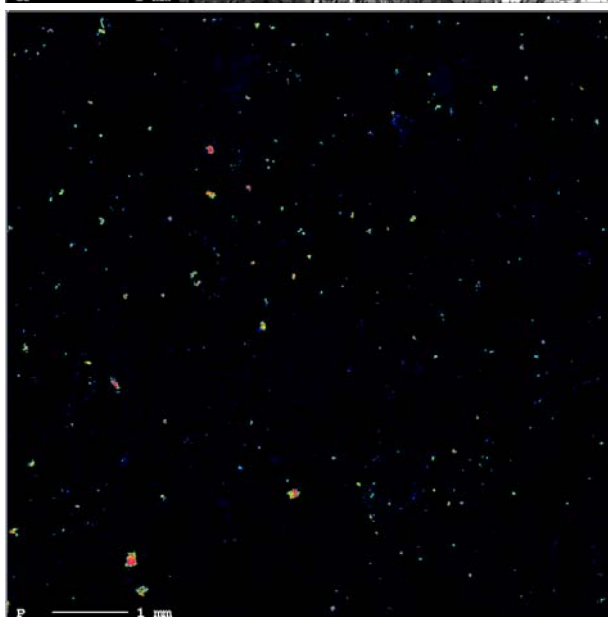

P K $\alpha$

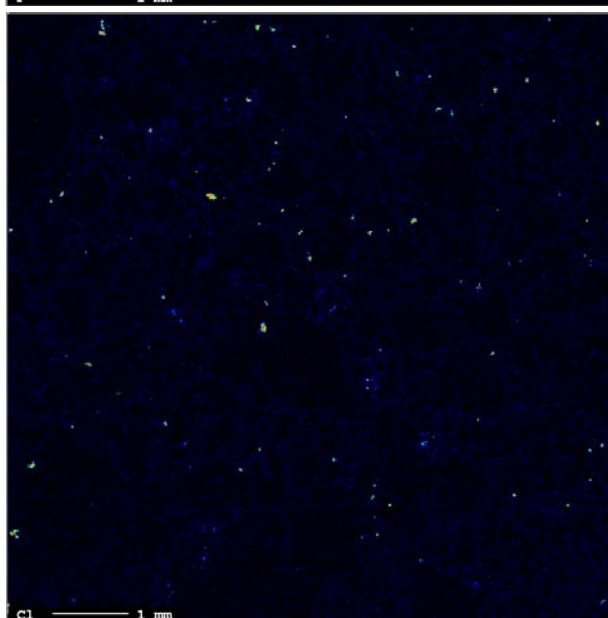

Cl K $\alpha$



Figure EA5: St. Séverin, UNM 693

7.5 x 3 mm

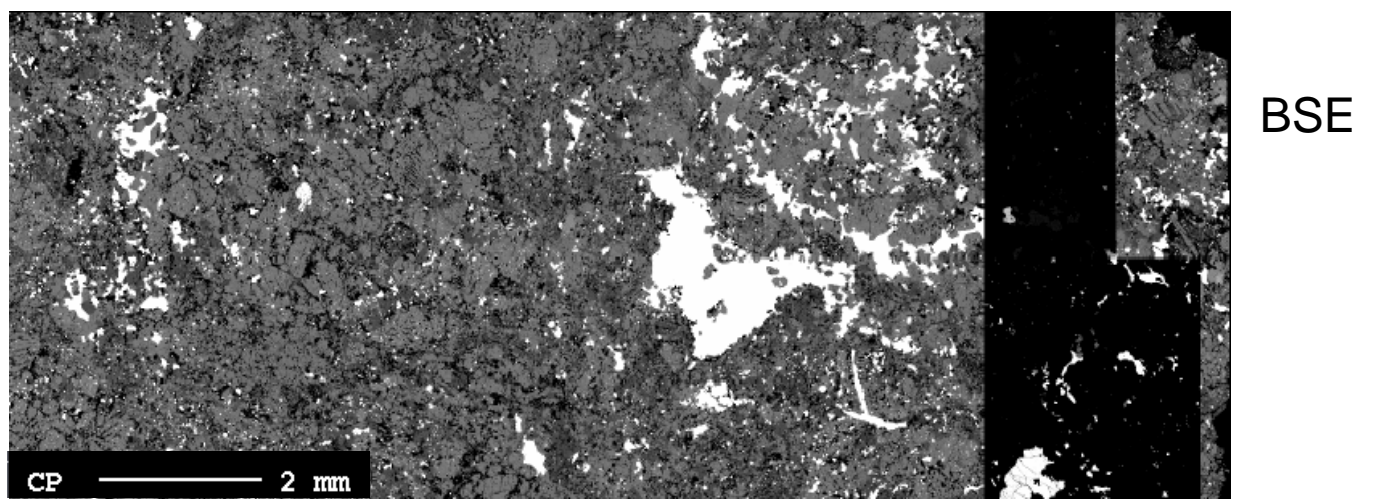

Note: A portion of the BSE image was not collected. This did not affect X-ray acquisition for P and Cl

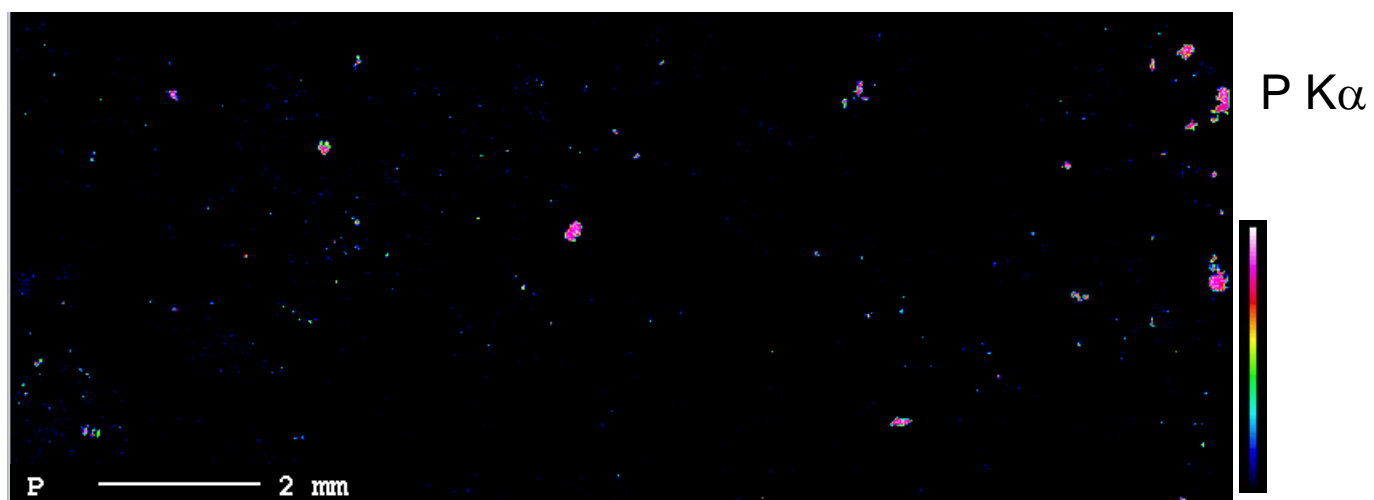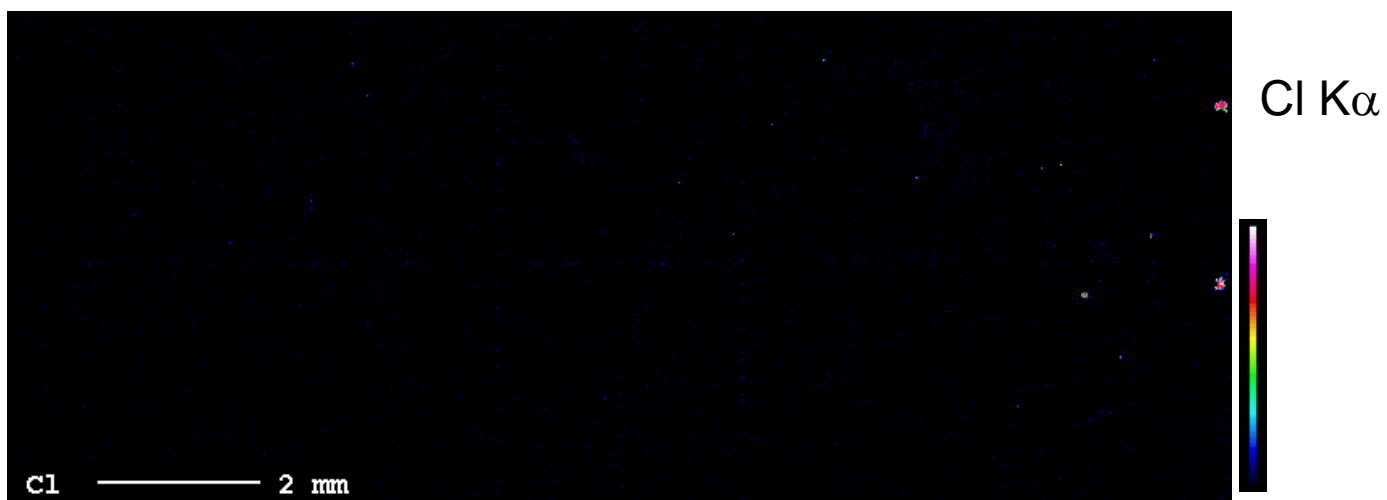

Supplement: mmc1 [file mmc1.pdf]
